# Supplementary material for: Bis(Disulfide)-Bridged Somatostatin-14 Analogs and Their [111In]In-Radioligands: Synthesis and Preclinical Profile
Source: MDPI journal article supplement (doi:10.3390/ijms25031921), 2024-02-05
Supplement: s1 [file s1]

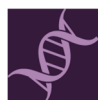

Article

# Supplementary Materials: Bis(Disulfide)-Bridged Somatostatin-14 Analogs and Their [ $^{111}\text{In}$ ]In-Radioligands: Synthesis and Preclinical Profile

Aikaterini Tatsi <sup>1,2</sup>, Theodosia Maina <sup>1,\*</sup>, Beatrice Waser <sup>3</sup>, Eric P. Krenning <sup>4</sup>, Marion de Jong <sup>5†</sup>, Jean-Claude Reubi <sup>3</sup>, Paul Cordopatis <sup>2†</sup> and Berthold A. Nock <sup>1</sup>

## ESI-MS and HPLC Results of Newly Synthesized AT5S and AT6S

The ESI-MS spectra and representative HPLC chromatograms for the new bicyclic 6/12-mer and 8/12-mer analogs AT5S and AT6, are shown in the following Figures S1-S4, confirming the formation and the high purity of the products.

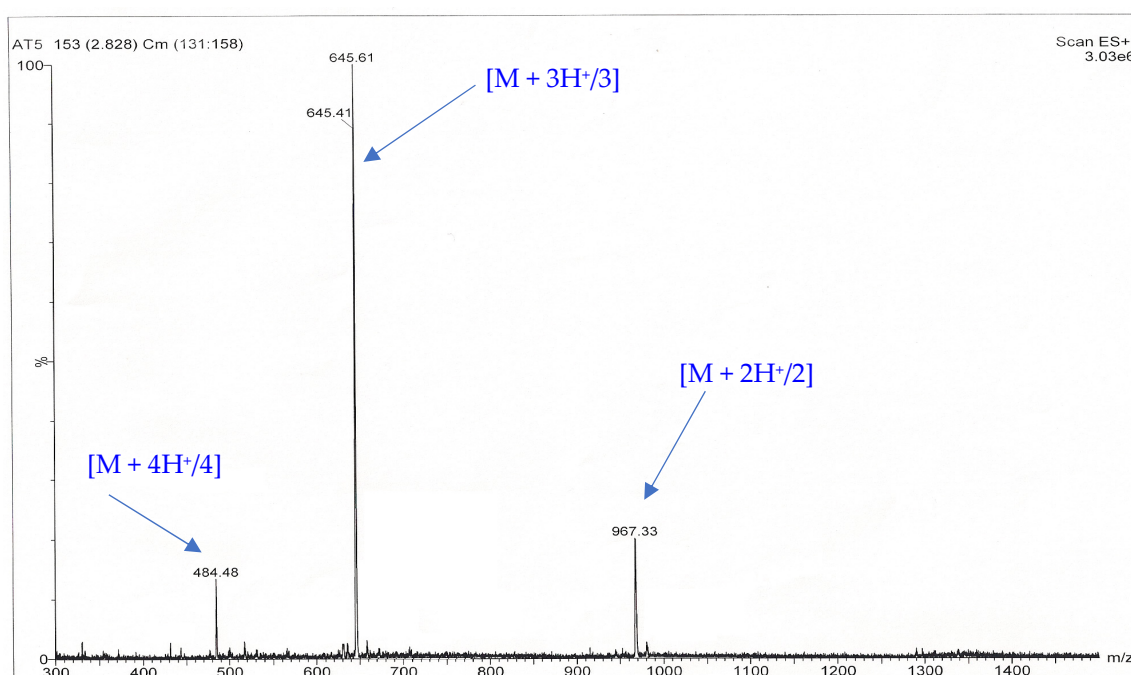

**Figure S1.** ESI-MS spectra confirming the formation of bicyclic 6/12-member-ring AT5S (DOTA-Ala<sup>1</sup>-Gly<sup>2</sup>-c[Cys<sup>3</sup>-Lys<sup>4</sup>-Asn<sup>5</sup>-c[Cys<sup>6</sup>-Phe<sup>7</sup>-DTrp<sup>8</sup>-Lys<sup>9</sup>-Thr<sup>10</sup>-Cys<sup>11</sup>]-Thr<sup>12</sup>-Ser<sup>13</sup>-Cys<sup>14</sup>]; DOTA, 1,4,7,10-tetraazacyclododecane-1,4,7,10-tetraacetic acid); Fragment ion peaks found by ESI-MS on a Micro-mass-Platform LC instrument (Waters Micromass Technologies, Milford, MA, USA): [M+2H<sup>+</sup>/2]: 967.3, [M+3H<sup>+</sup>/3]: 645.6, and [M+4H<sup>+</sup>/4]: 484.5.

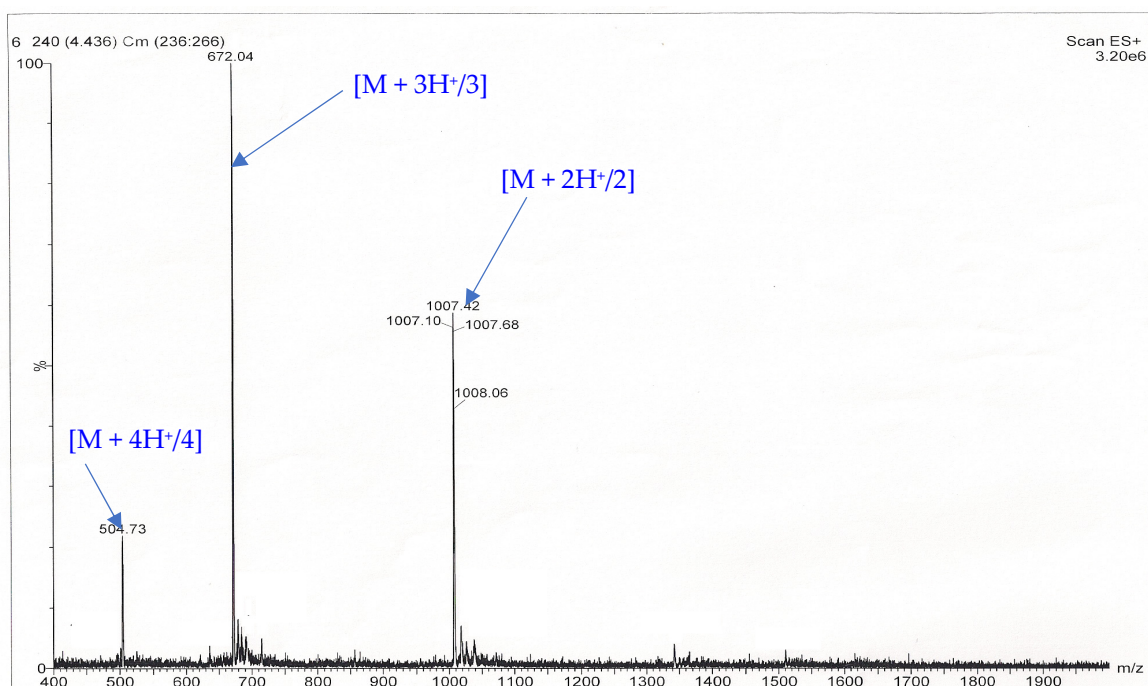

**Figure S2.** ESI-MS spectra confirming the formation of bicyclic 8/12-member-ring AT6S (DOTA-Ala<sup>1</sup>-Gly<sup>2</sup>-c[Cys<sup>3</sup>-Lys<sup>4</sup>-c[Cys<sup>5</sup>-Phe<sup>6</sup>-Phe<sup>7</sup>-DTrp<sup>8</sup>-Lys<sup>9</sup>-Thr<sup>10</sup>-Phe<sup>11</sup>-Cys<sup>12</sup>]-Ser<sup>13</sup>-Cys<sup>14</sup>]); Fragment ion peaks found by ESI-MS on a Micromass-Platform LC instrument (Waters Micromass Technologies, Milford, MA, USA):  $[M+2H^+/2]$ : 1007.4,  $[M+3H^+/3]$ : 672.4, and  $[M+4H^+/4]$ : 504.7.

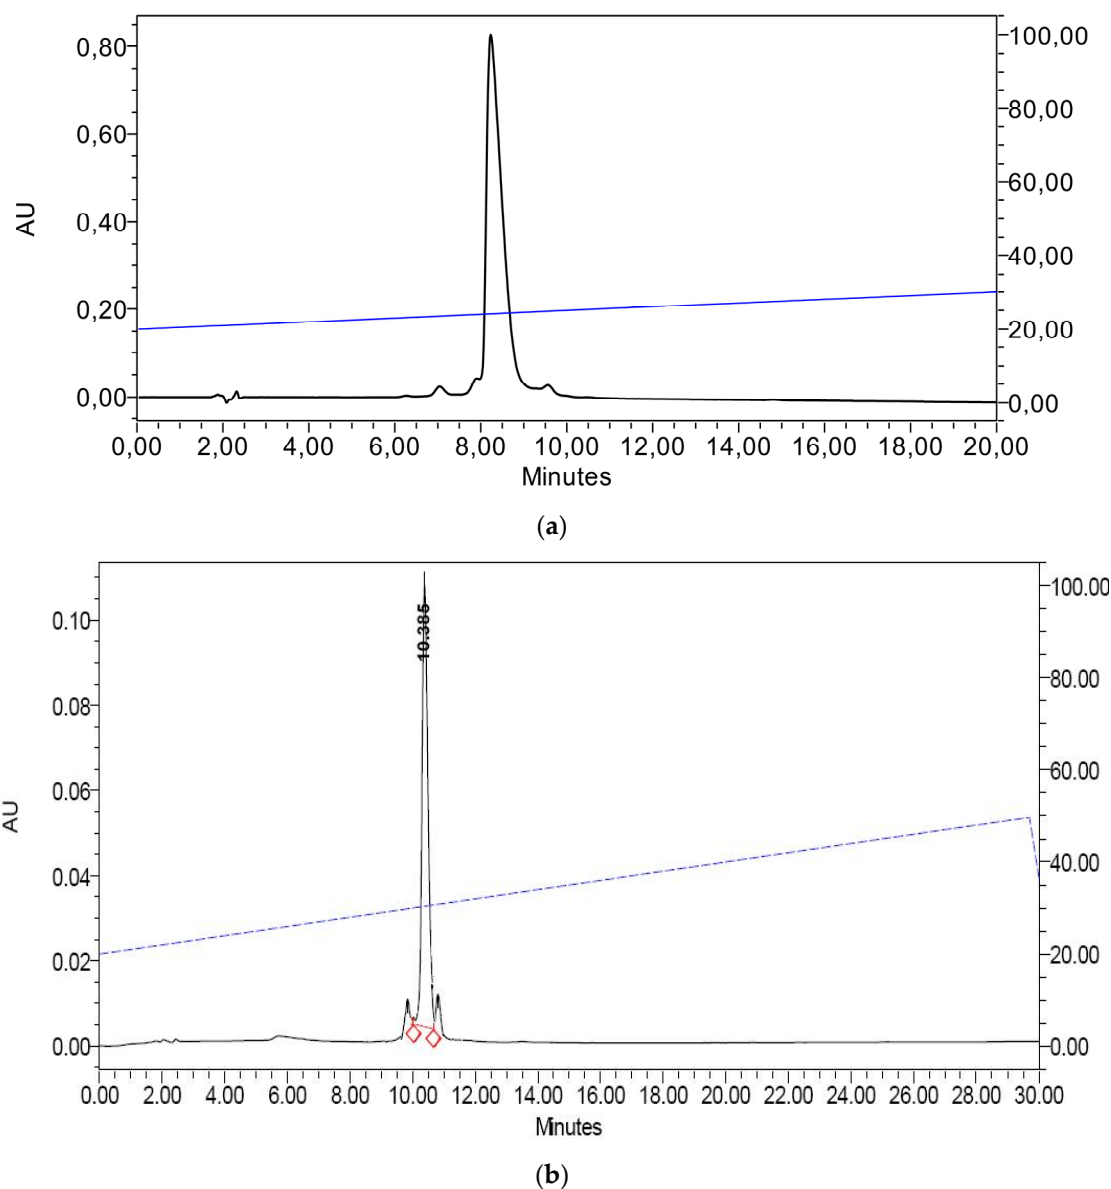

**Figure S3.** HPLC UV trace at 220 nm of the analysis of AT5S; (a) System 1: RP-HPLC on an XBridge™ Shield RP18 cartridge column (5  $\mu$ m, 4.6 mm  $\times$  150 mm; Waters, Eschborn, Germany) eluted at a 1 mL/min flow rate with a linear gradient from 80%A/20%B to 60%A/40%B in 40 min,  $t_R$  = 8.2 min; and (b) System 2: : RP-HPLC on a Symmetry C18 analytical column (3.5  $\mu$ m, 4.6 mm  $\times$  75 mm; Waters, Micromass Technologies, Milford, MA, USA) eluted at a 1 mL/min flow rate with a linear gradient from 90%A/10%B to 50%A/50%B in 20 min, whereby A = 0.1% aqueous TFA, B = MeCN;  $t_R$  = 10.34 min;  $\geq$  94%.

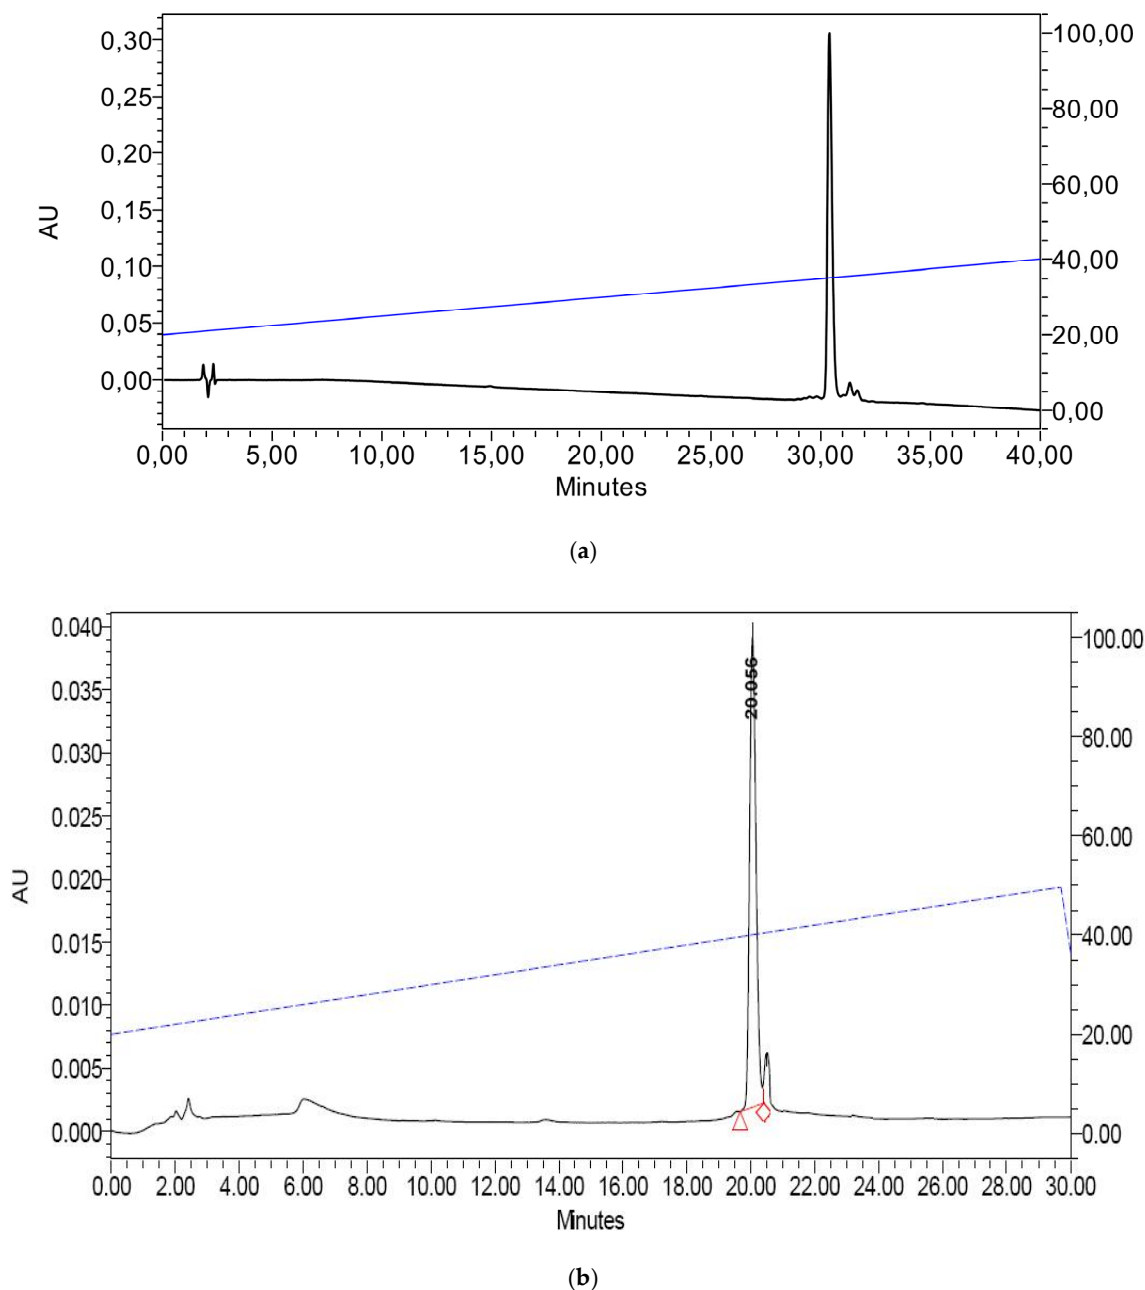

**Figure S4.** HPLC UV trace at 220 nm of the analysis of AT6S; (a) System 1: RP-HPLC on an XBridge™ Shield RP18 cartridge column (5  $\mu$ m, 4.6 mm  $\times$  150 mm; Waters, Eschborn, Germany) eluted at a 1 mL/min flow rate with a linear gradient from 80%A/20%B to 60%A/40%B in 40 min,  $t_R$  = 30.4 min; and (b) System 2: : RP-HPLC on a Symmetry C18 analytical column (3.5  $\mu$ m, 4.6 mm  $\times$  75 mm; Waters, Micromass Technologies, Milford, MA, USA) eluted at a 1 mL/min flow rate with a linear gradient from 90%A/10%B to 50%A/50%B in 20 min, whereby A = 0.1% aqueous TFA, B = MeCN;  $t_R$  = 20.06 min;  $\geq$  93%.
